# Supplementary material for: Lateral orbitofrontal neurons acquire responses to upshifted, downshifted, or blocked cues during unblocking
Source: eLife journal article supplement (doi:10.7554/elife.11299), 2015-12-15

**a** Downshift cells, downshift trials

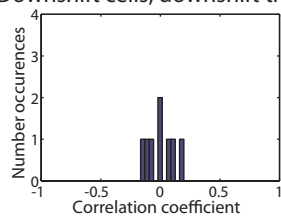

**b** Downshift cells, blocked trials

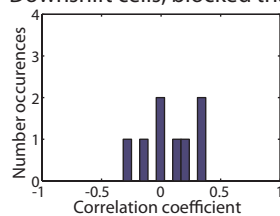

**c** Downshift cells, upshift trials

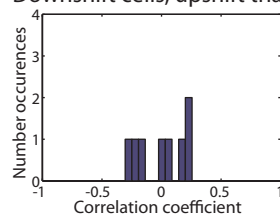

**d** Blocked cells, blocked trials

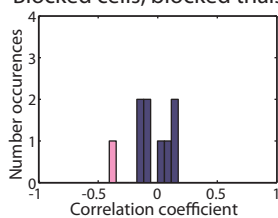

**e** Blocked cells, downshift trials

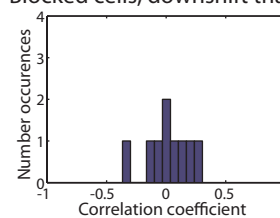

**f** Blocked cells, upshift trials

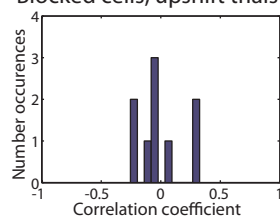

**g** Upshift cells, upshift trials

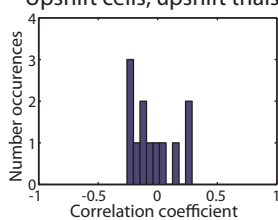

**h** Upshift cells, blocked trials

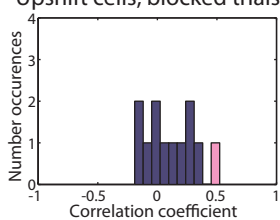

**i** Upshift cells, downshift trials

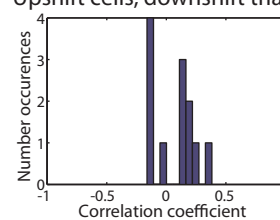

Supplement: supp [file elife_poa_e11299_Figure_3_figure_supplement_1.pdf › elife_poa_e11299_Figure_3_figure_supplement_1.pdf]
