# Supplementary figures and images for: Lateral orbitofrontal neurons acquire responses to upshifted, downshifted, or blocked cues during unblocking
Source: eLife journal article supplement (doi:10.7554/elife.11299), 2015-12-15

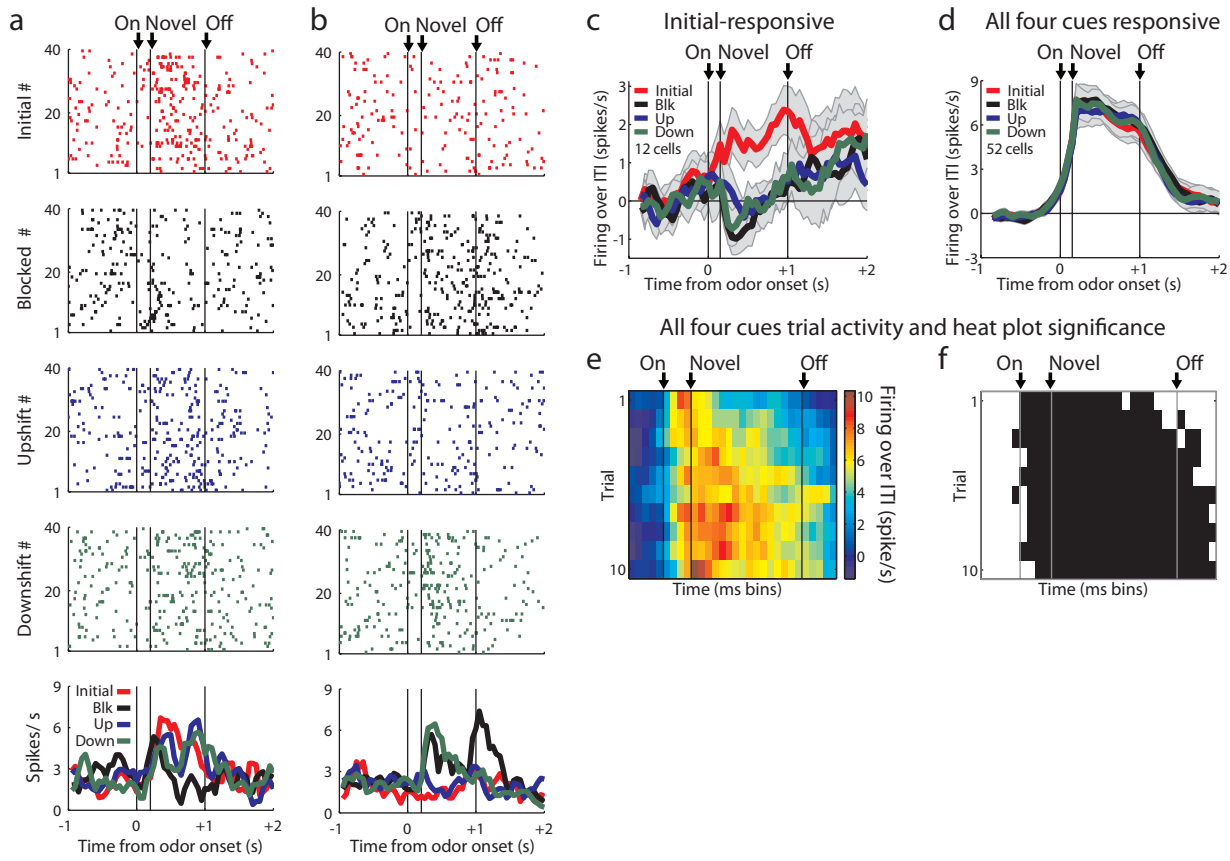

Supplement: supp [file elife_poa_e11299_Figure_2_figure_supplement_1.pdf › elife_poa_e11299_Figure_2_figure_supplement_1.pdf]

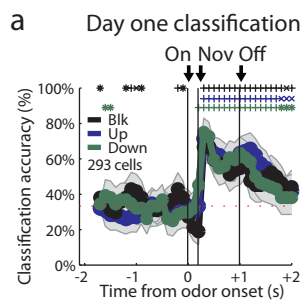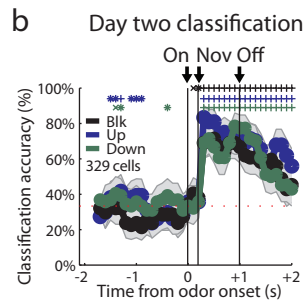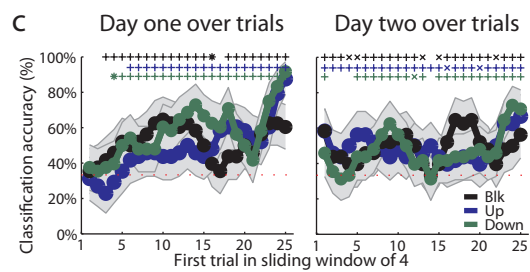

Supplement: supp [file elife_poa_e11299_Figure_2_figure_supplement_2.pdf › elife_poa_e11299_Figure_2_figure_supplement_2.pdf]
